# Supplementary material
Source: PubMed Central journal article supplement (PMC4056644)
Supplement: jn.113.189480_nutrition189480SupplementaryData1.pdf [file jn.113.189480_nutrition189480SupplementaryData1.pdf]

Supplemental Table 1. Spearman correlation of selected variables at baseline in 24 healthy adults, aged 50-69 y<sup>1</sup>

|                  | BMI          | Serum CML      | Urinary CML  | IL-6             | CRP              | VCAM-1       | TNF $\alpha$ -R1 | TNF $\alpha$ -R2 | sRAGE        | esRAGE           | Fasting glucose |
|------------------|--------------|----------------|--------------|------------------|------------------|--------------|------------------|------------------|--------------|------------------|-----------------|
| Age              | $r = -0.238$ | $r = 0.407^*$  | $r = -0.007$ | $r = -0.154$     | $r = -0.320$     | $r = -0.301$ | $r = -0.226$     | $r = 0.167$      | $r = -0.036$ | $r = 0.126$      | $r = 0.184$     |
| BMI              |              | $r = -0.498^*$ | $r = 0.114$  | $r = 0.518^{**}$ | $r = 0.662^{**}$ | $r = -0.249$ | $r = -0.178$     | $r = -0.238$     | $r = -0.240$ | $r = 0.002$      | $r = 0.197$     |
| Serum CML        |              |                | $r = -0.301$ | $r = -0.260$     | $r = -0.316$     | $r = 0.115$  | $r = 0.196$      | $r = 0.309$      | $r = -0.070$ | $r = -0.112$     | $r = -0.015$    |
| Urinary CML      |              |                |              | $r = -0.136$     | $r = -0.083$     | $r = -0.390$ | $r = -0.249$     | $r = -0.023$     | $r = 0.353$  | $r = -0.184$     | $r = -0.103$    |
| IL-6             |              |                |              |                  | $r = 0.36$       | $r = 0.078$  | $r = 0.081$      | $r = -0.064$     | $r = -0.355$ | $r = -0.363$     | $r = 0.058$     |
| CRP              |              |                |              |                  |                  | $r = -0.258$ | $r = 0.137$      | $r = 0.032$      | $r = -0.084$ | $r = -0.057$     | $r = 0.017$     |
| VCAM-1           |              |                |              |                  |                  |              | $r = 0.445^*$    | $r = -0.199$     | $r = 0.084$  | $r = -0.328$     | $r = -0.144$    |
| TNF $\alpha$ -R1 |              |                |              |                  |                  |              |                  | $r = 0.027$      | $r = -0.175$ | $r = -0.358$     | $r = -0.182$    |
| TNF $\alpha$ -R2 |              |                |              |                  |                  |              |                  |                  | $r = 0.215$  | $r = 0.071$      | $r = -0.401$    |
| sRAGE            |              |                |              |                  |                  |              |                  |                  |              | $r = 0.614^{**}$ | $r = 0.034$     |
| esRAGE           |              |                |              |                  |                  |              |                  |                  |              |                  | $r = 0.272$     |

<sup>1</sup>IL-6, interleukin 6; CRP, C-reactive protein; VCAM-1, vascular cell adhesion molecule 1; TNF- $\alpha$  R1, tumor necrosis factor- $\alpha$  receptor 1; TNF- $\alpha$  R2, tumor necrosis factor- $\alpha$  receptor 2; sRAGE, secretory receptor for advanced glycation end products; esRAGE, endogenous secretory receptor for advanced glycation endproducts

\* $P < 0.05$

\*\* $P < 0.01$
